# Supplementary material
Source: publisher figshare collection journal article supplement (https://tandf.figshare.com/ndownloader/files/15234968)
Supplement: Supplementary file 1 [file 15234968]

# Supplementary appendix

## Supplementary material

Operational definitions of moderate-to-severe exacerbations and severe exacerbations of COPD The primary outcome of interest was acute exacerbations of COPD, as recorded by validated read codes (H312200, H3y1.00) from clinical and referral files [16]. We defined this as moderate-to-severe exacerbations of COPD. The secondary outcomes were COPD-related hospitalisations/A&E visit evaluated using Read codes (8H2R.00, 66Yi.00) from both clinical and/or referral file in addition to validated Read codes (H312200, H3y1.00) for acute exacerbations of COPD from the referral file. This was defined as severe exacerbations of COPD. We also evaluate the risk of all-cause mortality. The clinical file contains all the medical history data entered on the GP system, including symptoms, signs and diagnoses. This can be used to identify any clinical diagnoses, and deaths. The data is coded using Read codes, which allow linkage of codes to the medical terms provided while the referral file contain information involving patient referrals to external care centres (normally to secondary care locations such as hospitals for inpatient or outpatient care) [17].

**Table S1. Read codes and descriptions**

| Read code | Medical code | Clinical event | Read term                                                 |
|-----------|--------------|----------------|-----------------------------------------------------------|
| H312200   | 1446         | 172705         | Acute exacerbation of chronic obstructive airways disease |
| H3y1.00   | 7884         | 58765          | Chron Obstruct Pulmonary dis with exacerbation, unspec    |
| 8H2R.00   | 11019        | 13645          | Admit COPD emergency                                      |
| 66Yi.00   | 46036        | 956            | Multiple COPD emergency hospital admissions               |

| <b>Table S2</b> Risk of moderate-to-severe exacerbations with ICS use stratified by absolute and relative eosinophil counts among COPD patients.                                                                                                                                                                                                                                                                                                                                                                                                                                                                                                                                                                                                                                                                                                                                                                                                                                                                                  |                                                            |                 |                                     |                                   |
|-----------------------------------------------------------------------------------------------------------------------------------------------------------------------------------------------------------------------------------------------------------------------------------------------------------------------------------------------------------------------------------------------------------------------------------------------------------------------------------------------------------------------------------------------------------------------------------------------------------------------------------------------------------------------------------------------------------------------------------------------------------------------------------------------------------------------------------------------------------------------------------------------------------------------------------------------------------------------------------------------------------------------------------|------------------------------------------------------------|-----------------|-------------------------------------|-----------------------------------|
|                                                                                                                                                                                                                                                                                                                                                                                                                                                                                                                                                                                                                                                                                                                                                                                                                                                                                                                                                                                                                                   | Moderate-to-severe exacerbations<br>(n=6,767) <sup>¶</sup> | IR<br>(/1000PY) | Age and gender adjusted HR (95% CI) | Adjusted HR (95% CI) <sup>a</sup> |
| Absolute eosinophil's counts                                                                                                                                                                                                                                                                                                                                                                                                                                                                                                                                                                                                                                                                                                                                                                                                                                                                                                                                                                                                      |                                                            |                 |                                     |                                   |
| Withdrawal of ICS                                                                                                                                                                                                                                                                                                                                                                                                                                                                                                                                                                                                                                                                                                                                                                                                                                                                                                                                                                                                                 |                                                            |                 |                                     |                                   |
| <0.40 x 10 <sup>9</sup> cells/L                                                                                                                                                                                                                                                                                                                                                                                                                                                                                                                                                                                                                                                                                                                                                                                                                                                                                                                                                                                                   | 1,677                                                      | 49.4            | 0.55(0.51-0.60) <sup>c</sup>        | 0.72(0.66-0.79) <sup>c</sup>      |
| ≥0.40 x 10 <sup>9</sup> cells/L                                                                                                                                                                                                                                                                                                                                                                                                                                                                                                                                                                                                                                                                                                                                                                                                                                                                                                                                                                                                   | 314                                                        | 48.8            | 0.56(0.49-0.63)                     | 0.70(0.62-0.80)                   |
| Continuous ICS user                                                                                                                                                                                                                                                                                                                                                                                                                                                                                                                                                                                                                                                                                                                                                                                                                                                                                                                                                                                                               |                                                            |                 |                                     |                                   |
| <0.40 x 10 <sup>9</sup> cells/L                                                                                                                                                                                                                                                                                                                                                                                                                                                                                                                                                                                                                                                                                                                                                                                                                                                                                                                                                                                                   | 3,970                                                      | 85.4            | 0.96(0.89-1.03)                     | 0.98(0.91-1.05)                   |
| ≥0.40 x 10 <sup>9</sup> cells/L                                                                                                                                                                                                                                                                                                                                                                                                                                                                                                                                                                                                                                                                                                                                                                                                                                                                                                                                                                                                   | 806                                                        | 87.9            | <b>Reference</b>                    | <b>Reference</b>                  |
| Relative eosinophil counts                                                                                                                                                                                                                                                                                                                                                                                                                                                                                                                                                                                                                                                                                                                                                                                                                                                                                                                                                                                                        |                                                            |                 |                                     |                                   |
| Withdrawal of ICS                                                                                                                                                                                                                                                                                                                                                                                                                                                                                                                                                                                                                                                                                                                                                                                                                                                                                                                                                                                                                 |                                                            |                 |                                     |                                   |
| <6.0%                                                                                                                                                                                                                                                                                                                                                                                                                                                                                                                                                                                                                                                                                                                                                                                                                                                                                                                                                                                                                             | 1,817                                                      | 49.3            | 0.54(0.49-0.60) <sup>c</sup>        | 0.67(0.60-0.74) <sup>c</sup>      |
| ≥6.0%                                                                                                                                                                                                                                                                                                                                                                                                                                                                                                                                                                                                                                                                                                                                                                                                                                                                                                                                                                                                                             | 174                                                        | 48.6            | 0.54(0.46-0.65)                     | 0.68(0.57-0.81)                   |
| Continuous ICS user                                                                                                                                                                                                                                                                                                                                                                                                                                                                                                                                                                                                                                                                                                                                                                                                                                                                                                                                                                                                               |                                                            |                 |                                     |                                   |
| <6.0%                                                                                                                                                                                                                                                                                                                                                                                                                                                                                                                                                                                                                                                                                                                                                                                                                                                                                                                                                                                                                             | 4,333                                                      | 85.4            | 0.94(0.85-1.03)                     | 0.91(0.82-1.00)                   |
| ≥6.0%                                                                                                                                                                                                                                                                                                                                                                                                                                                                                                                                                                                                                                                                                                                                                                                                                                                                                                                                                                                                                             | 443                                                        | 89.6            | <b>Reference</b>                    | <b>Reference</b>                  |
| Abbreviations: ICS, Inhaled corticosteroids; IR, incidence rate; HR, hazard ratio; CI, confidence interval; PY, person-years.<br>a) Adjusted for age, gender, smoking status, body mass index, alcohol use, history of heart failure, chronic liver disease, ischemic heart disease, antipsychotic, antidepressants, atopic dermatitis, use of oxygen, short-acting beta-2 agonists, long-acting beta-2 agonists, short-acting muscarinic antagonists, long-acting muscarinic antagonists, xanthine derivatives and oral corticosteroid 6 months prior to the start of an interval.<br>b) Wald's statistics: Withdrawal of ICS with low eosinophil counts statistically significantly different (P<0.05) from withdrawal of ICS with high eosinophil count.<br>c) Wald's statistics: Withdrawal of ICS with low eosinophil counts statistically significantly different (P<0.05) from continuous ICS use with low eosinophil count.<br><sup>¶</sup> numbers of never ICS user with moderate-to-severe exacerbations not included. |                                                            |                 |                                     |                                   |

| <b>Table S3.</b> Risk of severe exacerbations with ICS use stratified by absolute and relative eosinophil counts among COPD patients.                                                                                                                                                                                                                                                                                                                                                                                                                                                                                                                                                                                                                                                                                                                                                                                                                                                                                                                                                           |                                                |                 |                                     |                                   |
|-------------------------------------------------------------------------------------------------------------------------------------------------------------------------------------------------------------------------------------------------------------------------------------------------------------------------------------------------------------------------------------------------------------------------------------------------------------------------------------------------------------------------------------------------------------------------------------------------------------------------------------------------------------------------------------------------------------------------------------------------------------------------------------------------------------------------------------------------------------------------------------------------------------------------------------------------------------------------------------------------------------------------------------------------------------------------------------------------|------------------------------------------------|-----------------|-------------------------------------|-----------------------------------|
|                                                                                                                                                                                                                                                                                                                                                                                                                                                                                                                                                                                                                                                                                                                                                                                                                                                                                                                                                                                                                                                                                                 | Severe exacerbations<br>(n=1,177) <sup>¶</sup> | IR<br>(/1000PY) | Age and gender adjusted HR (95% CI) | Adjusted HR (95% CI) <sup>a</sup> |
| Absolute eosinophil's counts                                                                                                                                                                                                                                                                                                                                                                                                                                                                                                                                                                                                                                                                                                                                                                                                                                                                                                                                                                                                                                                                    |                                                |                 |                                     |                                   |
| Withdrawal of ICS                                                                                                                                                                                                                                                                                                                                                                                                                                                                                                                                                                                                                                                                                                                                                                                                                                                                                                                                                                                                                                                                               |                                                |                 |                                     |                                   |
| <0.40 x 10 <sup>9</sup> cells/L                                                                                                                                                                                                                                                                                                                                                                                                                                                                                                                                                                                                                                                                                                                                                                                                                                                                                                                                                                                                                                                                 | 268                                            | 6.9             | 0.57(0.47-0.71) <sup>c</sup>        | 0.79(0.64-0.98) <sup>c</sup>      |
| ≥0.40 x 10 <sup>9</sup> cells/L                                                                                                                                                                                                                                                                                                                                                                                                                                                                                                                                                                                                                                                                                                                                                                                                                                                                                                                                                                                                                                                                 | 58                                             | 7.8             | 0.65(0.48-0.89)                     | 0.87(0.64-1.19)                   |
| Continuous ICS user                                                                                                                                                                                                                                                                                                                                                                                                                                                                                                                                                                                                                                                                                                                                                                                                                                                                                                                                                                                                                                                                             |                                                |                 |                                     |                                   |
| <0.40 x 10 <sup>9</sup> cells/L                                                                                                                                                                                                                                                                                                                                                                                                                                                                                                                                                                                                                                                                                                                                                                                                                                                                                                                                                                                                                                                                 | 713                                            | 12.4            | 1.03(0.86-1.24)                     | 1.05(0.88-1.26)                   |
| ≥0.40 x 10 <sup>9</sup> cells/L                                                                                                                                                                                                                                                                                                                                                                                                                                                                                                                                                                                                                                                                                                                                                                                                                                                                                                                                                                                                                                                                 | 138                                            | 11.9            | <b>Reference</b>                    | <b>Reference</b>                  |
| Relative eosinophil counts                                                                                                                                                                                                                                                                                                                                                                                                                                                                                                                                                                                                                                                                                                                                                                                                                                                                                                                                                                                                                                                                      |                                                |                 |                                     |                                   |
| Withdrawal of ICS                                                                                                                                                                                                                                                                                                                                                                                                                                                                                                                                                                                                                                                                                                                                                                                                                                                                                                                                                                                                                                                                               |                                                |                 |                                     |                                   |
| <6.0%                                                                                                                                                                                                                                                                                                                                                                                                                                                                                                                                                                                                                                                                                                                                                                                                                                                                                                                                                                                                                                                                                           | 298                                            | 7.0             | 0.59(0.46-0.76) <sup>c</sup>        | 0.78(0.60-1.01) <sup>c</sup>      |
| ≥6.0%                                                                                                                                                                                                                                                                                                                                                                                                                                                                                                                                                                                                                                                                                                                                                                                                                                                                                                                                                                                                                                                                                           | 28                                             | 6.8             | 0.58(0.37-0.89)                     | 0.77(0.50-1.20)                   |
| Continuous ICS user                                                                                                                                                                                                                                                                                                                                                                                                                                                                                                                                                                                                                                                                                                                                                                                                                                                                                                                                                                                                                                                                             |                                                |                 |                                     |                                   |
| <6.0%                                                                                                                                                                                                                                                                                                                                                                                                                                                                                                                                                                                                                                                                                                                                                                                                                                                                                                                                                                                                                                                                                           | 776                                            | 12.3            | 1.04(0.82-1.32)                     | 1.01(0.79-1.28)                   |
| ≥6.0%                                                                                                                                                                                                                                                                                                                                                                                                                                                                                                                                                                                                                                                                                                                                                                                                                                                                                                                                                                                                                                                                                           | 75                                             | 11.9            | <b>Reference</b>                    | <b>Reference</b>                  |
| Abbreviations: ICS, Inhaled corticosteroids; IR, incidence rate; HR, hazard ratio; CI, confidence interval; PY, person-years; AE, accident & emergency.<br>a) Adjusted for age, gender, smoking status, body mass index, alcohol use, history of heart failure, chronic liver disease, diabetes mellitus, ischemic heart disease, osteoporosis, use of proton-pump inhibitors, antidepressants, oxygen, antipsychotics, statins, short-acting beta-2 agonists, long-acting beta-2 agonists, short-acting muscarinic antagonists, long-acting muscarinic antagonists, xanthine derivatives and oral corticosteroid 6 months prior to the start of an interval.<br>b) Wald's statistics: Withdrawal of ICS with low eosinophil counts statistically significantly different (P<0.05) from withdrawal of ICS with high eosinophil count.<br>c) Wald's statistics: Withdrawal of ICS with low eosinophil counts statistically significantly different (P<0.05) from continuous ICS use with low eosinophil count.<br><sup>¶</sup> numbers of never ICS user with severe exacerbations not included. |                                                |                 |                                     |                                   |

| <b>Table S4.</b> Risk of all-cause mortality with ICS use stratified by absolute and relative eosinophil counts among COPD patients.                                                                                                                                                                                                                                                                                                                                                                                                                                                                                                                                                                                                                                                                                                                                                                                                                                                                                                 |                                               |                 |                                     |                                   |
|--------------------------------------------------------------------------------------------------------------------------------------------------------------------------------------------------------------------------------------------------------------------------------------------------------------------------------------------------------------------------------------------------------------------------------------------------------------------------------------------------------------------------------------------------------------------------------------------------------------------------------------------------------------------------------------------------------------------------------------------------------------------------------------------------------------------------------------------------------------------------------------------------------------------------------------------------------------------------------------------------------------------------------------|-----------------------------------------------|-----------------|-------------------------------------|-----------------------------------|
|                                                                                                                                                                                                                                                                                                                                                                                                                                                                                                                                                                                                                                                                                                                                                                                                                                                                                                                                                                                                                                      | All-cause mortality<br>(n=6,008) <sup>¶</sup> | IR<br>(/1000PY) | Age and gender adjusted HR (95% CI) | Adjusted HR (95% CI) <sup>a</sup> |
| Absolute eosinophil's counts                                                                                                                                                                                                                                                                                                                                                                                                                                                                                                                                                                                                                                                                                                                                                                                                                                                                                                                                                                                                         |                                               |                 |                                     |                                   |
| Withdrawal of ICS                                                                                                                                                                                                                                                                                                                                                                                                                                                                                                                                                                                                                                                                                                                                                                                                                                                                                                                                                                                                                    |                                               |                 |                                     |                                   |
| <0.40 x 10 <sup>9</sup> cells/L                                                                                                                                                                                                                                                                                                                                                                                                                                                                                                                                                                                                                                                                                                                                                                                                                                                                                                                                                                                                      | 1,805                                         | 45.3            | 0.94(0.86-1.03) <sup>c</sup>        | 1.15(1.05 -1.26) <sup>c</sup>     |
| ≥0.40 x 10 <sup>9</sup> cells/L                                                                                                                                                                                                                                                                                                                                                                                                                                                                                                                                                                                                                                                                                                                                                                                                                                                                                                                                                                                                      | 373                                           | 49.0            | 0.96(0.85-1.10)                     | 1.13(0.99-1.28)                   |
| Continuous ICS user                                                                                                                                                                                                                                                                                                                                                                                                                                                                                                                                                                                                                                                                                                                                                                                                                                                                                                                                                                                                                  |                                               |                 |                                     |                                   |
| <0. 40 x 10 <sup>9</sup> cells/L                                                                                                                                                                                                                                                                                                                                                                                                                                                                                                                                                                                                                                                                                                                                                                                                                                                                                                                                                                                                     | 3,220                                         | 54.3            | 1.13(1.04-1.24)                     | 1.15(1.05-1.25)                   |
| ≥0.40 x 10 <sup>9</sup> cells/L                                                                                                                                                                                                                                                                                                                                                                                                                                                                                                                                                                                                                                                                                                                                                                                                                                                                                                                                                                                                      | 610                                           | 51.1            | <b>Reference</b>                    | <b>Reference</b>                  |
| Relative eosinophil counts                                                                                                                                                                                                                                                                                                                                                                                                                                                                                                                                                                                                                                                                                                                                                                                                                                                                                                                                                                                                           |                                               |                 |                                     |                                   |
| Withdrawal of ICS                                                                                                                                                                                                                                                                                                                                                                                                                                                                                                                                                                                                                                                                                                                                                                                                                                                                                                                                                                                                                    |                                               |                 |                                     |                                   |
| <6.0%                                                                                                                                                                                                                                                                                                                                                                                                                                                                                                                                                                                                                                                                                                                                                                                                                                                                                                                                                                                                                                | 1,982                                         | 45.8            | 1.04 (0.93-1.17) <sup>c</sup>       | 1.27(1.12-1.43)                   |
| ≥6.0%                                                                                                                                                                                                                                                                                                                                                                                                                                                                                                                                                                                                                                                                                                                                                                                                                                                                                                                                                                                                                                | 196                                           | 46.6            | 0.93(0.78-1.11)                     | 1.11(0.93-1.33)                   |
| Continuous ICS user                                                                                                                                                                                                                                                                                                                                                                                                                                                                                                                                                                                                                                                                                                                                                                                                                                                                                                                                                                                                                  |                                               |                 |                                     |                                   |
| <6.0%                                                                                                                                                                                                                                                                                                                                                                                                                                                                                                                                                                                                                                                                                                                                                                                                                                                                                                                                                                                                                                | 3,506                                         | 54.1            | 1.24(1.11-1.39)                     | 1.25(1.12-1.40)                   |
| ≥6.0%                                                                                                                                                                                                                                                                                                                                                                                                                                                                                                                                                                                                                                                                                                                                                                                                                                                                                                                                                                                                                                | 324                                           | 49.8            | <b>Reference</b>                    | <b>Reference</b>                  |
| <p>Abbreviations: ICS, Inhaled corticosteroids; IR, incidence rate; HR, hazard ratio; CI, confidence interval; PY, person-years.</p> <p>a) Adjusted for age, gender, smoking status, body mass index, alcohol use, history of heart failure, chronic liver disease, ischemic heart disease, atopic dermatitis, diabetes mellitus, cancer, use of oxygen, statins, short-acting beta-2 agonists, long-acting beta-2 agonists, short-acting muscarinic antagonists, long-acting muscarinic antagonists, xanthine derivatives and oral corticosteroid use 6 months prior to the start of an interval.</p> <p>b) Wald's statistics: Withdrawal of ICS low eosinophil counts statistically significantly different (P&lt;0.05) from withdrawal of ICS with high eosinophil count.</p> <p>c) Wald's statistics: Withdrawal of ICS with low eosinophil counts statistically significantly different (P&lt;0.05) from continuous ICS use with low eosinophil count.</p> <p><sup>¶</sup> numbers of never ICS user who died not included.</p> |                                               |                 |                                     |                                   |

| <b>Table S5.</b> Risk of moderate-to-severe exacerbations with ICS use stratified by absolute and relative eosinophil counts among COPD patients.                                                                                                                                                                                                                                                                                                  |                                                         |              |                                     |                                   |
|----------------------------------------------------------------------------------------------------------------------------------------------------------------------------------------------------------------------------------------------------------------------------------------------------------------------------------------------------------------------------------------------------------------------------------------------------|---------------------------------------------------------|--------------|-------------------------------------|-----------------------------------|
|                                                                                                                                                                                                                                                                                                                                                                                                                                                    | Moderate-to-severe exacerbations (n=6,767) <sup>¶</sup> | IR (/1000PY) | Age and gender adjusted HR (95% CI) | Adjusted HR (95% CI) <sup>a</sup> |
| Absolute eosinophil counts                                                                                                                                                                                                                                                                                                                                                                                                                         |                                                         |              |                                     |                                   |
| Withdrawal of ICS                                                                                                                                                                                                                                                                                                                                                                                                                                  |                                                         |              |                                     |                                   |
| <0.15 x 10 <sup>9</sup> cells/L                                                                                                                                                                                                                                                                                                                                                                                                                    | 640                                                     | 47.9         | 0.56(0.51-0.61) <sup>c</sup>        | 0.71(0.65-0.78) <sup>c</sup>      |
| ≥0.15 x 10 <sup>9</sup> cells/L                                                                                                                                                                                                                                                                                                                                                                                                                    | 1,351                                                   | 50.0         | 0.59(0.55-0.63)                     | 0.74(0.69-0.79)                   |
| Continuous ICS user                                                                                                                                                                                                                                                                                                                                                                                                                                |                                                         |              |                                     |                                   |
| <0.15 x 10 <sup>9</sup> cells/L                                                                                                                                                                                                                                                                                                                                                                                                                    | 1,617                                                   | 87.0         | 1.02(0.96-1.08)                     | 1.00 (0.94-1.06)                  |
| ≥0.15 x 10 <sup>9</sup> cells/L                                                                                                                                                                                                                                                                                                                                                                                                                    | 3,159                                                   | 85.2         | <b>Reference</b>                    | <b>Reference</b>                  |
| Relative eosinophil counts                                                                                                                                                                                                                                                                                                                                                                                                                         |                                                         |              |                                     |                                   |
| Withdrawal of ICS                                                                                                                                                                                                                                                                                                                                                                                                                                  |                                                         |              |                                     |                                   |
| <2.0%                                                                                                                                                                                                                                                                                                                                                                                                                                              | 701                                                     | 49.8         | 0.59(0.54-0.64) <sup>c</sup>        | 0.72(0.67-0.79) <sup>c</sup>      |
| ≥2.0%                                                                                                                                                                                                                                                                                                                                                                                                                                              | 1,290                                                   | 49.0         | 0.59(0.55-0.63)                     | 0.74(0.69-0.79)                   |
| Continuous ICS user                                                                                                                                                                                                                                                                                                                                                                                                                                |                                                         |              |                                     |                                   |
| <2.0%                                                                                                                                                                                                                                                                                                                                                                                                                                              | 1,799                                                   | 89.8         | 1.07(1.01-1.13)                     | 1.02(0.96-1.08)                   |
| ≥2.0%                                                                                                                                                                                                                                                                                                                                                                                                                                              | 2,977                                                   | 83.6         | <b>Reference</b>                    | <b>Reference</b>                  |
| Abbreviations: ICS, Inhaled corticosteroids; IR, incidence rate; HR, hazard ratio; CI, confidence interval; PY, person-years.                                                                                                                                                                                                                                                                                                                      |                                                         |              |                                     |                                   |
| a) Adjusted for age, gender, smoking status, body mass index, alcohol use, history of heart failure, chronic liver disease, ischemic heart disease, antipsychotic, antidepressants, atopic dermatitis, use of oxygen, short-acting beta-2 agonists, long-acting beta-2 agonists, short-acting muscarinic antagonists, long-acting muscarinic antagonists, xanthine derivatives and oral corticosteroid 6 months prior to the start of an interval. |                                                         |              |                                     |                                   |
| b) Wald's statistics: Withdrawal of ICS with low eosinophil counts statistically significantly different (P<0.05) from withdrawal of ICS with high eosinophil count.                                                                                                                                                                                                                                                                               |                                                         |              |                                     |                                   |
| c) Wald's statistics: Withdrawal of ICS with low eosinophil counts statistically significantly different (P<0.05) from continuous ICS use with low eosinophil count.                                                                                                                                                                                                                                                                               |                                                         |              |                                     |                                   |
| <sup>¶</sup> numbers of never ICS user with moderate-to-severe exacerbations not included.                                                                                                                                                                                                                                                                                                                                                         |                                                         |              |                                     |                                   |

| <b>Table S6.</b> Risk of severe exacerbations with ICS use stratified by absolute and relative eosinophil counts among COPD patients.                                                                                                                                                                                                                                                                                                                                                                                                                                                                                                                                                                                                                                                                                                                                                                                                                                                                                                                                                                                            |                                                |                 |                                     |                                   |
|----------------------------------------------------------------------------------------------------------------------------------------------------------------------------------------------------------------------------------------------------------------------------------------------------------------------------------------------------------------------------------------------------------------------------------------------------------------------------------------------------------------------------------------------------------------------------------------------------------------------------------------------------------------------------------------------------------------------------------------------------------------------------------------------------------------------------------------------------------------------------------------------------------------------------------------------------------------------------------------------------------------------------------------------------------------------------------------------------------------------------------|------------------------------------------------|-----------------|-------------------------------------|-----------------------------------|
|                                                                                                                                                                                                                                                                                                                                                                                                                                                                                                                                                                                                                                                                                                                                                                                                                                                                                                                                                                                                                                                                                                                                  | Severe exacerbations<br>(n=1,177) <sup>¶</sup> | IR<br>(/1000PY) | Age and gender adjusted HR (95% CI) | Adjusted HR (95% CI) <sup>a</sup> |
| Absolute eosinophil counts                                                                                                                                                                                                                                                                                                                                                                                                                                                                                                                                                                                                                                                                                                                                                                                                                                                                                                                                                                                                                                                                                                       |                                                |                 |                                     |                                   |
| Withdrawal of ICS                                                                                                                                                                                                                                                                                                                                                                                                                                                                                                                                                                                                                                                                                                                                                                                                                                                                                                                                                                                                                                                                                                                |                                                |                 |                                     |                                   |
| <0.15 x 10 <sup>9</sup> cells/L                                                                                                                                                                                                                                                                                                                                                                                                                                                                                                                                                                                                                                                                                                                                                                                                                                                                                                                                                                                                                                                                                                  | 115                                            | 7.5             | 0.65(0.53-0.80) <sup>c</sup>        | 0.88(0.71-1.08) <sup>c</sup>      |
| ≥0.15 x 10 <sup>9</sup> cells/L                                                                                                                                                                                                                                                                                                                                                                                                                                                                                                                                                                                                                                                                                                                                                                                                                                                                                                                                                                                                                                                                                                  | 211                                            | 6.8             | 0.59(0.50-0.69)                     | 0.79(0.67-0.93)                   |
| Continuous ICS user                                                                                                                                                                                                                                                                                                                                                                                                                                                                                                                                                                                                                                                                                                                                                                                                                                                                                                                                                                                                                                                                                                              |                                                |                 |                                     |                                   |
| <0.15 x 10 <sup>9</sup> cells/L                                                                                                                                                                                                                                                                                                                                                                                                                                                                                                                                                                                                                                                                                                                                                                                                                                                                                                                                                                                                                                                                                                  | 317                                            | 13.8            | 1.19(1.04-1.37)                     | 1.17(1.02-1.35)                   |
| ≥0.15 x 10 <sup>9</sup> cells/L                                                                                                                                                                                                                                                                                                                                                                                                                                                                                                                                                                                                                                                                                                                                                                                                                                                                                                                                                                                                                                                                                                  | 534                                            | 11.6            | <b>Reference</b>                    | <b>Reference</b>                  |
| Relative eosinophil counts                                                                                                                                                                                                                                                                                                                                                                                                                                                                                                                                                                                                                                                                                                                                                                                                                                                                                                                                                                                                                                                                                                       |                                                |                 |                                     |                                   |
| Withdrawal of ICS                                                                                                                                                                                                                                                                                                                                                                                                                                                                                                                                                                                                                                                                                                                                                                                                                                                                                                                                                                                                                                                                                                                |                                                |                 |                                     |                                   |
| <2.0%                                                                                                                                                                                                                                                                                                                                                                                                                                                                                                                                                                                                                                                                                                                                                                                                                                                                                                                                                                                                                                                                                                                            | 125                                            | 7.7             | 0.69(0.57-0.85) <sup>c</sup>        | 0.89(0.73-1.09) <sup>c</sup>      |
| ≥2.0%                                                                                                                                                                                                                                                                                                                                                                                                                                                                                                                                                                                                                                                                                                                                                                                                                                                                                                                                                                                                                                                                                                                            | 201                                            | 6.6             | 0.59(0.50-0.70)                     | 0.80(0.67-0.95)                   |
| Continuous ICS user                                                                                                                                                                                                                                                                                                                                                                                                                                                                                                                                                                                                                                                                                                                                                                                                                                                                                                                                                                                                                                                                                                              |                                                |                 |                                     |                                   |
| <2.0%                                                                                                                                                                                                                                                                                                                                                                                                                                                                                                                                                                                                                                                                                                                                                                                                                                                                                                                                                                                                                                                                                                                            | 355                                            | 14.3            | 1.28(1.11-1.46)                     | 1.20(1.05-1.38)                   |
| ≥2.0%                                                                                                                                                                                                                                                                                                                                                                                                                                                                                                                                                                                                                                                                                                                                                                                                                                                                                                                                                                                                                                                                                                                            | 496                                            | 11.2            | <b>Reference</b>                    | <b>Reference</b>                  |
| <p>Abbreviations: ICS, Inhaled corticosteroids; IR, incidence rate; HR, hazard ratio; CI, confidence interval; PY, person-years; AE, accident &amp; emergency.</p> <p>a) Adjusted for age, gender, smoking status, body mass index, alcohol use, history of heart failure, chronic liver disease, diabetes mellitus, ischemic heart disease, osteoporosis, use of proton-pump inhibitors, antidepressants, oxygen, antipsychotics, statins, short-acting beta-2 agonists, long-acting beta-2 agonists, short-acting muscarinic antagonists, long-acting muscarinic antagonists, xanthine derivatives and oral corticosteroid 6 months prior to the start of an interval.</p> <p>b) Wald's statistics: Withdrawal of ICS with low eosinophil counts statistically significantly different (P&lt;0.05) from withdrawal of ICS with high eosinophil count.</p> <p>c) Wald's statistics: Withdrawal of ICS with low eosinophil counts statistically significantly different (P&lt;0.05) from continuous ICS use with low eosinophil count.</p> <p><sup>¶</sup> numbers of never ICS user with severe exacerbations not included.</p> |                                                |                 |                                     |                                   |

| <b>Table S7.</b> Risk of all-cause mortality with ICS use stratified by absolute and relative eosinophil counts among COPD patients.                                                                                                                                                                                                                                                                                                                                                                                                                                                                                                                                                                                                                                                                                                                                                                                                                                                                                                      |                                            |              |                                     |                                   |
|-------------------------------------------------------------------------------------------------------------------------------------------------------------------------------------------------------------------------------------------------------------------------------------------------------------------------------------------------------------------------------------------------------------------------------------------------------------------------------------------------------------------------------------------------------------------------------------------------------------------------------------------------------------------------------------------------------------------------------------------------------------------------------------------------------------------------------------------------------------------------------------------------------------------------------------------------------------------------------------------------------------------------------------------|--------------------------------------------|--------------|-------------------------------------|-----------------------------------|
|                                                                                                                                                                                                                                                                                                                                                                                                                                                                                                                                                                                                                                                                                                                                                                                                                                                                                                                                                                                                                                           | All-cause mortality (n=6,008) <sup>¶</sup> | IR (/1000PY) | Age and gender adjusted HR (95% CI) | Adjusted HR (95% CI) <sup>a</sup> |
| Absolute eosinophil counts                                                                                                                                                                                                                                                                                                                                                                                                                                                                                                                                                                                                                                                                                                                                                                                                                                                                                                                                                                                                                |                                            |              |                                     |                                   |
| Withdrawal of ICS                                                                                                                                                                                                                                                                                                                                                                                                                                                                                                                                                                                                                                                                                                                                                                                                                                                                                                                                                                                                                         |                                            |              |                                     |                                   |
| <0.15 x 10 <sup>9</sup> cells/L                                                                                                                                                                                                                                                                                                                                                                                                                                                                                                                                                                                                                                                                                                                                                                                                                                                                                                                                                                                                           | 825                                        | 52.8         | 1.06(0.97-1.14) <sup>b, c</sup>     | 1.23(1.13-1.33)                   |
| ≥0.15 x 10 <sup>9</sup> cells/L                                                                                                                                                                                                                                                                                                                                                                                                                                                                                                                                                                                                                                                                                                                                                                                                                                                                                                                                                                                                           | 1,353                                      | 42.5         | 0.88(0.82-0.94)                     | 1.05(0.98-1.13)                   |
| Continuous ICS user                                                                                                                                                                                                                                                                                                                                                                                                                                                                                                                                                                                                                                                                                                                                                                                                                                                                                                                                                                                                                       |                                            |              |                                     |                                   |
| <0.15 x 10 <sup>9</sup> cells/L                                                                                                                                                                                                                                                                                                                                                                                                                                                                                                                                                                                                                                                                                                                                                                                                                                                                                                                                                                                                           | 1,526                                      | 64.4         | 1.31(1.23-1.40)                     | 1.27(1.19-1.35)                   |
| ≥0.15 x 10 <sup>9</sup> cells/L                                                                                                                                                                                                                                                                                                                                                                                                                                                                                                                                                                                                                                                                                                                                                                                                                                                                                                                                                                                                           | 2,304                                      | 48.4         | <b>Reference</b>                    | <b>Reference</b>                  |
| Relative eosinophil counts                                                                                                                                                                                                                                                                                                                                                                                                                                                                                                                                                                                                                                                                                                                                                                                                                                                                                                                                                                                                                |                                            |              |                                     |                                   |
| Withdrawal of ICS                                                                                                                                                                                                                                                                                                                                                                                                                                                                                                                                                                                                                                                                                                                                                                                                                                                                                                                                                                                                                         |                                            |              |                                     |                                   |
| <2.0%                                                                                                                                                                                                                                                                                                                                                                                                                                                                                                                                                                                                                                                                                                                                                                                                                                                                                                                                                                                                                                     | 892                                        | 54.0         | 1.16(1.07-1.25) <sup>b, c</sup>     | 1.30(1.20-1.41) <sup>b</sup>      |
| ≥2.0%                                                                                                                                                                                                                                                                                                                                                                                                                                                                                                                                                                                                                                                                                                                                                                                                                                                                                                                                                                                                                                     | 1,286                                      | 41.6         | 0.89(0.83-0.95)                     | 1.06(0.99-1.14)                   |
| Continuous ICS user                                                                                                                                                                                                                                                                                                                                                                                                                                                                                                                                                                                                                                                                                                                                                                                                                                                                                                                                                                                                                       |                                            |              |                                     |                                   |
| <2.0%                                                                                                                                                                                                                                                                                                                                                                                                                                                                                                                                                                                                                                                                                                                                                                                                                                                                                                                                                                                                                                     | 1,692                                      | 65.8         | 1.44(1.35-1.53)                     | 1.34(1.26-1.43)                   |
| ≥2.0%                                                                                                                                                                                                                                                                                                                                                                                                                                                                                                                                                                                                                                                                                                                                                                                                                                                                                                                                                                                                                                     | 2,138                                      | 46.9         | <b>Reference</b>                    | <b>Reference</b>                  |
| <p>Abbreviations: ICS, Inhaled corticosteroids; IR, incidence rate; HR, hazard ratio; CI, confidence interval; PY, person-years.</p> <p>a) Adjusted for age, gender, smoking status, body mass index, alcohol use, history of heart failure, chronic liver disease, ischemic heart disease, atopic dermatitis, diabetes mellitus, cancer, use of oxygen, statins, short-acting beta-2 agonists, long-acting beta-2 agonists, short-acting muscarinic antagonists, long-acting muscarinic antagonists, xanthine derivatives and oral corticosteroid use 6 months prior to the start of an interval.</p> <p>b) Wald's statistics: Withdrawal of ICS with low eosinophil counts statistically significantly different (P&lt;0.05) from withdrawal of ICS with high eosinophil count.</p> <p>c) Wald's statistics: Withdrawal of ICS with low eosinophil counts statistically significantly different (P&lt;0.05) from continuous ICS use with low eosinophil count.</p> <p><sup>¶</sup> numbers of never ICS user who died not included.</p> |                                            |              |                                     |                                   |
